# Supplementary material for: Exploring the Potential of Heteroatom-Doped Graphene Nanoribbons as a Catalyst for Oxygen Reduction
Source: MDPI journal article supplement (doi:10.3390/nano13212831), 2023-10-26
Supplement: s1 [file s1]

Supporting information for

## **Exploring the Potential of Heteroatom-Doped Graphene Nanoribbons as a Catalyst for Oxygen Reduction**

*Eduardo S. F. Cardoso<sup>1</sup>, Guilherme V. Fortunato<sup>2</sup>, Clauber D. Rodrigues<sup>3</sup>, Marcos R. V. Lanza<sup>2</sup>,  
Gilberto Maia<sup>1,\*</sup>*

<sup>1</sup>Institute of Chemistry, Federal University of Mato Grosso do Sul, Av. Senador Filinto Muller  
1555, Campo Grande, MS 79074-460, Brazil

<sup>2</sup>São Carlos Institute of Chemistry, University of São Paulo, Avenida Trabalhador São-Carlense  
400, São Carlos, SP 13566-590, Brazil

<sup>3</sup>State University of Mato Grosso do Sul; Rua Rogério Luis Rodrigues s/n, Gló riade Dourados,  
MS 79730-000, Brazil

\*Corresponding author. Tel: +55 67 3345 3596. E-mail: gilberto.maia@ufms.br (Gilberto Maia)

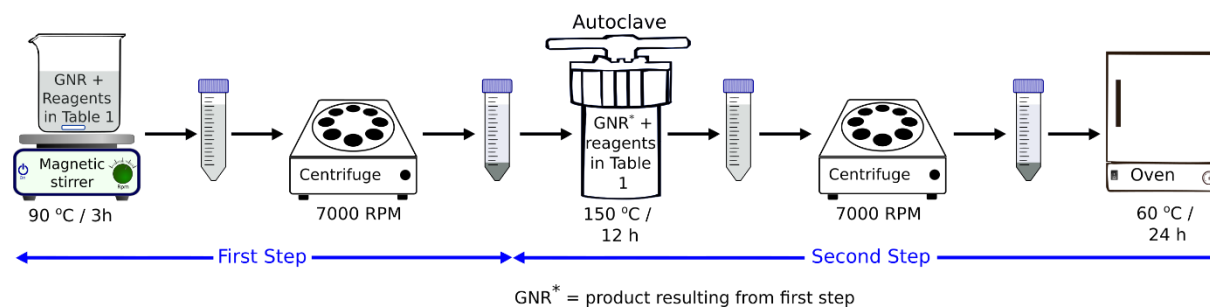

**Figure S1.** Scheme illustrating the modification of GNR to produce GNRN, GNRS, GNRP, GNRNS, GNRNP, GNRSP, and GNRNSP.

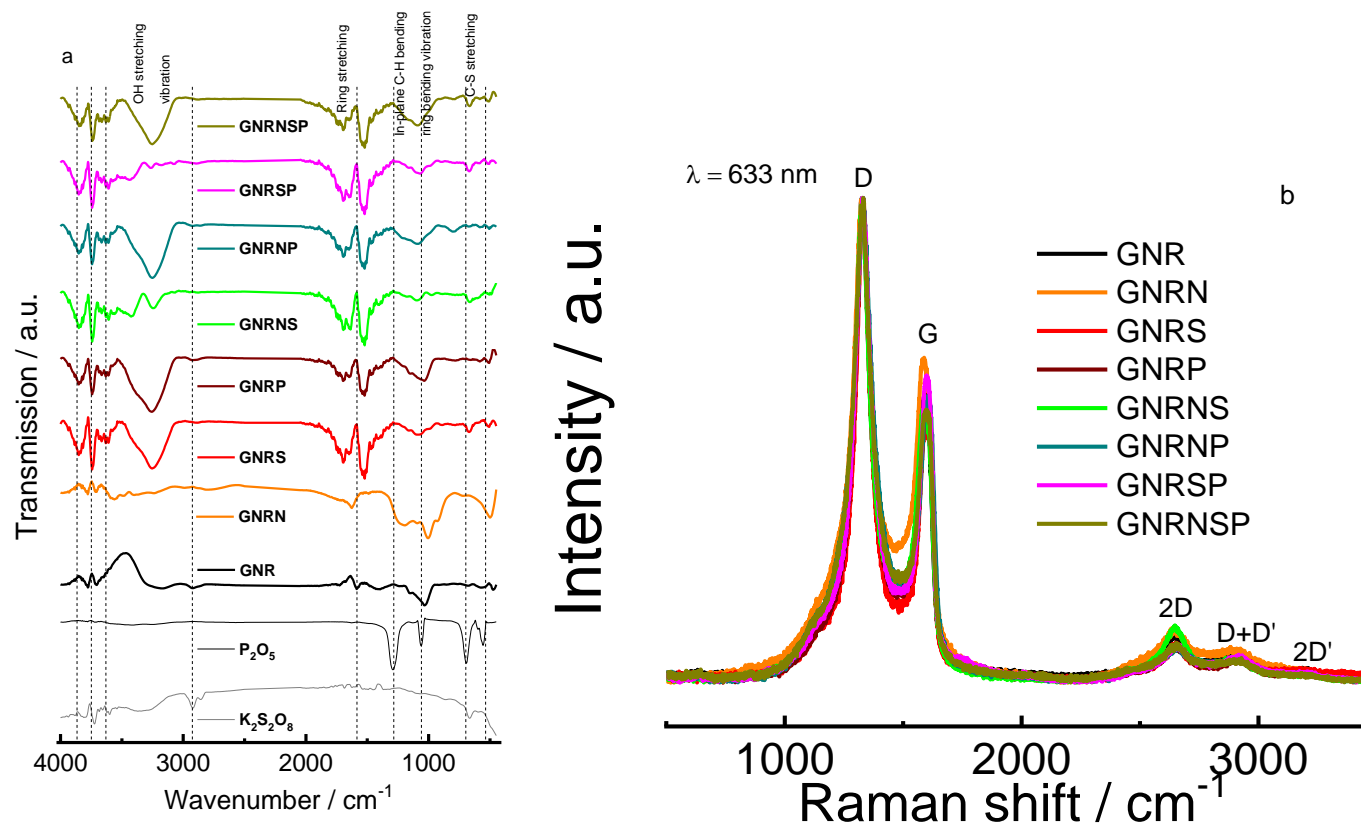

**Figure S2.** a) FT-IR spectra for different samples of doped and undoped GNR,  $\text{K}_2\text{S}_2\text{O}_8$ , and  $\text{P}_2\text{O}_5$ . b) Raman spectra for the undoped and doped GNR samples.

**Table S1.** FT-IR attributions for the different doped and undoped GNR samples.

| Catalyst      | Attribution [1,2]                                      |                                                                   |                                                                                               |                                                                                |                                               | C-S stretching  |
|---------------|--------------------------------------------------------|-------------------------------------------------------------------|-----------------------------------------------------------------------------------------------|--------------------------------------------------------------------------------|-----------------------------------------------|-----------------|
|               | OH stretching vibration from water (cm <sup>-1</sup> ) | Ring stretching (cm <sup>-1</sup> )                               | In-plane C-H bending strongly mixed with C—C vibrations or C-N stretching (cm <sup>-1</sup> ) | Ring bending vibration or C-P stretching or C—S stretching (cm <sup>-1</sup> ) | Out-of-plane ring bending (cm <sup>-1</sup> ) |                 |
| <b>GNR</b>    | 3,182 (discreet broad peak)                            | 1,587 (weak peak)                                                 | 1,150 (weak peak)                                                                             | 1,026 (broad strong peak)                                                      | -                                             |                 |
| <b>GNRN</b>   | -                                                      | 1,626 (weak peak)                                                 | 1,203 (broad peak)                                                                            | 1,005 (strong peak)                                                            | 500 (strong peak)                             |                 |
| <b>GNRS</b>   | 3,254 (broad strong peak)                              | Strong peaks at 1,693-1,637 (exhibited two peaks) and 1,527       | 1,086 (broad small peak)                                                                      |                                                                                | -                                             | 669 (weak peak) |
| <b>GNRP</b>   | 3,256 (broad strong peak)                              | Well-defined peaks at 1,693-1,637 (exhibited two peaks) and 1,530 | 1,038 (broad strong peak)                                                                     |                                                                                | -                                             | -               |
| <b>GNRNS</b>  | 3,240 (weak peak)                                      | Well-defined peaks at 1,693-1,637 (exhibited two peaks) and 1,522 | 1,095 (broad weak peak)                                                                       |                                                                                | -                                             | 667 (weak peak) |
| <b>GNRNP</b>  | 3,252 (broad strong peak)                              | Well-defined peaks at 1,693-1,649 (exhibited two peaks) and 1,528 | 1,088 (broad strong peak)                                                                     |                                                                                | -                                             | -               |
| <b>GNRSP</b>  | -                                                      | Well-defined peaks at 1,693-1,637 (exhibited two peaks) and 1,526 | 1,068 (broad weak peak)                                                                       |                                                                                | -                                             | 669 (weak peak) |
| <b>GNRNSP</b> | 3,254 (broad strong peak)                              | Well-defined peaks at 1,693-1,637 (exhibited two peaks) and 1,522 | 1,088 (broad strong peak)                                                                     |                                                                                | -                                             | 667 (weak peak) |

**Table S2.** Raman bands attributions for the different doped and undoped GNR catalysts and the  $I_D/I_G$  ratio.

| Catalyst      | Band ( $\text{cm}^{-1}$ ) |      |       |      |      |      | $I_D/I_G$ |
|---------------|---------------------------|------|-------|------|------|------|-----------|
|               | D                         | G    | D+D'' | 2D   | D+D' | 2D'  |           |
| <b>GNR</b>    | 1328                      | 1598 | 2460  | 2644 | 2904 | 3197 | 1.723     |
| <b>GNRN</b>   | 1324                      | 1587 | 2474  | 2646 | 2904 | 3210 | 1.508     |
| <b>GNRS</b>   | 1330                      | 1599 | 2470  | 2654 | 2922 | 3207 | 2.001     |
| <b>GNRP</b>   | 1328                      | 1599 | 2487  | 2649 | 2916 | 3208 | 1.697     |
| <b>GNRNS</b>  | 1327                      | 1589 | 2464  | 2645 | 2905 | 3221 | 1.789     |
| <b>GNRNP</b>  | 1331                      | 1605 | 2463  | 2656 | 2919 | 3234 | 1.724     |
| <b>GNRSP</b>  | 1329                      | 1600 | 2483  | 2659 | 2923 | 3218 | 1.575     |
| <b>GNRNSP</b> | 1328                      | 1600 | 2442  | 2655 | 2920 | 3219 | 1.757     |

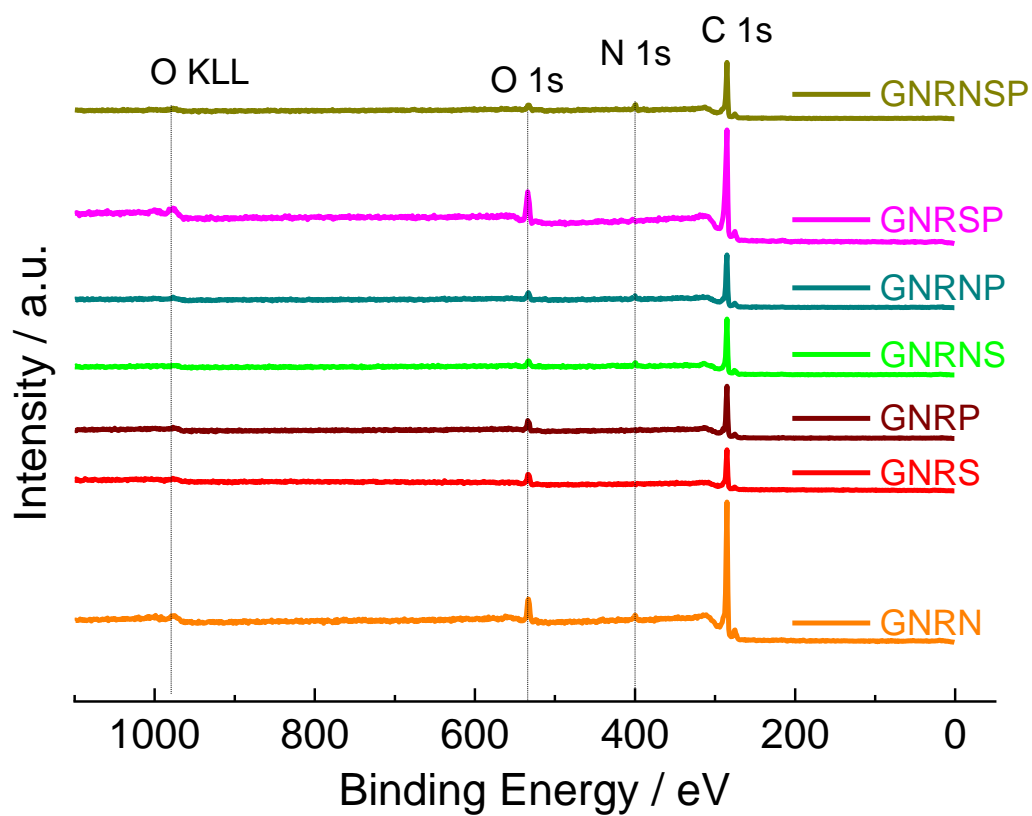

**Figure S3.** XPS survey spectra of the doped GNR samples.

**Table S3.** Positions, relative sensitivity factors (R.S.F.), atomic and mass percentages obtained from the survey XPS spectra shown in Figure S2 for the doped GNR samples investigated.

| Catalyst      | Name | Position (eV) | R.S.F. | Content (at. %) | Content (mass %) |
|---------------|------|---------------|--------|-----------------|------------------|
| <b>GNRN</b>   | C 1s | 285.00        | 1.0    | 89.5            | 86.9             |
|               | N 1s | 400.00        | 1.8    | 2.5             | 2.8              |
|               | O 1s | 533.00        | 2.93   | 8.0             | 10.3             |
| <b>GNRS</b>   | C 1s | 285.0         | 1.0    | 87.8            | 84.4             |
|               | O 1s | 533.0         | 2.93   | 12.2            | 15.6             |
| <b>GNRP</b>   | C 1s | 285.0         | 1.0    | 91.0            | 88.4             |
|               | O 1s | 534.0         | 2.93   | 9.0             | 11.6             |
| <b>GNRNS</b>  | C 1s | 285.0         | 1.0    | 91.0            | 89.0             |
|               | N 1s | 400.0         | 1.8    | 3.6             | 4.0              |
|               | O 1s | 533.0         | 2.93   | 5.4             | 7.0              |
| <b>GNRNP</b>  | C 1s | 285.0         | 1.0    | 89.7            | 87.3             |
|               | N 1s | 400.0         | 1.8    | 4.3             | 4.9              |
|               | O 1s | 533.0         | 2.93   | 6.0             | 7.8              |
| <b>GNRSP</b>  | C 1s | 285.00        | 1.0    | 89.7            | 86.7             |
|               | O 1s | 534.00        | 2.93   | 10.3            | 13.3             |
| <b>GNRNSP</b> | C 1s | 285.0         | 1.0    | 91.2            | 89.3             |
|               | N 1s | 399.0         | 1.8    | 4.6             | 5.3              |
|               | O 1s | 533.0         | 2.93   | 4.2             | 5.4              |

**Table S4.** Elemental analyses of the undoped and doped GNR samples.

| <b>Catalyst</b> | <b>N (wt.%)</b> | <b>C (wt.%)</b> | <b>H (wt.%)</b> | <b>S (wt.%)</b> | <b>O (wt.%)</b> | <b>Others(wt.%)</b> |
|-----------------|-----------------|-----------------|-----------------|-----------------|-----------------|---------------------|
| <b>GNR</b>      | 1.0             | 85.2            | 0.9             | 0.0             | 9.7             | 3.2                 |
| <b>GNRN</b>     | 3.2             | 85.7            | 1.0             | 0.3             | 4.0             | 5.8                 |
| <b>GNRS</b>     | 0.2             | 84.9            | 1.9             | 0.0             | 8.4             | 4.6                 |
| <b>GNRP</b>     | 0.5             | 84.3            | 1.4             | 0.1             | 8.8             | 4.9                 |
| <b>GNRNS</b>    | 5.9             | 85.8            | 1.6             | 0.0             | 5.0             | 1.7                 |
| <b>GNRNP</b>    | 3.0             | 85.2            | 1.1             | 0.0             | 4.9             | 5.8                 |
| <b>GNRSP</b>    | 0.0             | 85.2            | 1.8             | 0.0             | 9.8             | 3.2                 |
| <b>GNRNSP</b>   | 6.2             | 84.0            | 2.5             | 0.0             | 4.8             | 2.5                 |

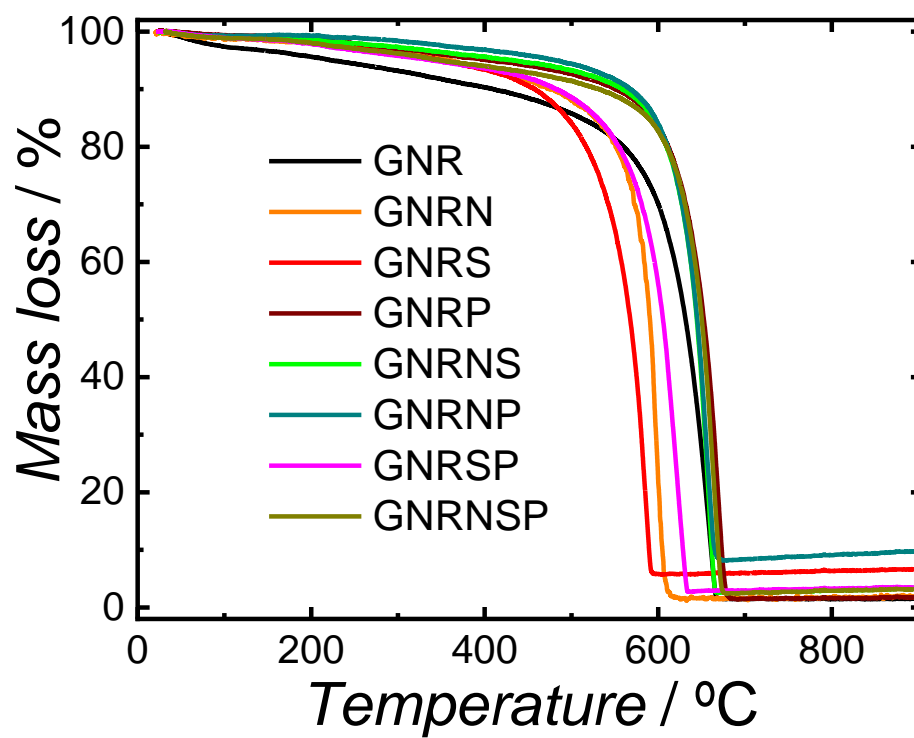

**Figure S4.** TG curves for the undoped and doped GNR samples.



**Table S5.** Positions and percentages of the content of functional groups or chemical states present in doped GNR samples obtained from high-resolution XPS spectra shown in Figure 3.

| Catalyst | Name | Chemical state   | Position (eV) | % content |
|----------|------|------------------|---------------|-----------|
| GNRN     | O 1s | C=O              | 532.2         | 47.9      |
|          |      | C–O              | 533.9         | 49.0      |
|          |      | H <sub>2</sub> O | 536.9         | 3.1       |
|          | C 1s | C=C & C–C        | 284.9         | 49.3      |
|          |      | C–OH & C–O–C     | 285.9         | 38.9      |
|          |      | C–N              | 287.6         | 7.3       |
|          |      | C=O & COOH       | 289.2         | 3.2       |
|          |      | $\pi$ – $\pi$    | 290.3         | 1.3       |
|          | N 1s | Pyridinic-N      | 399.1         | 18.2      |
|          |      | Pyrrolic-N       | 400.1         | 44.2      |
|          |      | Graphitic-N      | 401.3         | 32.4      |
|          |      | Oxidized-N       | 403.7         | 5.2       |
| GNRS     | O 1s | C=O              | 532.4         | 48.8      |
|          |      | C–O              | 534.1         | 43.2      |
|          |      | H <sub>2</sub> O | 536.4         | 8.0       |
|          | C 1s | C=C & C–C        | 284.9         | 59.2      |
|          |      | C–OH & C–O–C     | 285.9         | 19.5      |
|          |      | C–S              | 286.9         | 11.8      |
|          |      | C=O & COOH       | 288.0         | 3.2       |
|          |      | $\pi$ – $\pi$    | 289.5         | 6.3       |
|          | N 1s | Pyridinic-N      | 399.1         | 3.1       |
|          |      | Pyrrolic-N       | 400.1         | 22.9      |
|          |      | Graphitic-N      | 401.0         | 48.4      |
|          |      | Oxidized-N       | 402.4         | 25.6      |
| GNRP     | O 1s | C=O              | 532.5         | 46.2      |
|          |      | C–O              | 533.9         | 49.9      |
|          |      | H <sub>2</sub> O | 536.8         | 3.9       |
|          | C 1s | C=C & C–C        | 285           | 63.6      |
|          |      | C–OH & C–O–C     | 286           | 15.6      |
|          |      | C–P              | 286.7         | 11.0      |
|          |      | C=O & COOH       | 287.9         | 5.4       |
|          |      | $\pi$ – $\pi$    | 289.5         | 4.4       |
|          | N 1s | Pyridinic-N      | 399.4         | 7.9       |
|          |      | Pyrrolic-N       | 399.9         | 19.0      |
|          |      | Graphitic-N      | 401.1         | 57.6      |
|          |      | Oxidized-N       | 402.7         | 15.5      |
| GNRNS    | O 1s | C=O              | 532.1         | 40.4      |
|          |      | C–O              | 533.8         | 57.8      |
|          |      | H <sub>2</sub> O | 537.4         | 1.8       |
|          | C 1s | C=C & C–C        | 285           | 66.2      |
|          |      | C–OH & C–O–C     | 286           | 12.6      |
|          |      | C–S              | 286.7         | 9.5       |
|          |      | C–N              | 287.5         | 5.7       |
|          |      | C=O & COOH       | 288.6         | 2.6       |
|          |      | $\pi$ – $\pi$    | 289.8         | 3.4       |

|               |      |                  |       |      |
|---------------|------|------------------|-------|------|
| <b>GNRNP</b>  | N 1s | Pyridinic-N      | 398.5 | 17.8 |
|               |      | Pyrrolic-N       | 399.5 | 28   |
|               |      | Graphitic-N      | 400.6 | 48.6 |
|               |      | Oxidized-N       | 402.8 | 5.6  |
|               | O 1s | C=O              | 532.2 | 41.3 |
|               |      | C-O              | 533.9 | 55.3 |
|               |      | H <sub>2</sub> O | 537.3 | 3.4  |
|               | C 1s | C=C & C-C        | 285.1 | 64.8 |
|               |      | C-OH & C-O-C     | 286   | 13.7 |
|               |      | C-P              | 286.7 | 7.9  |
|               |      | C-N              | 287.5 | 6.6  |
|               |      | C=O & COOH       | 288.7 | 3.1  |
|               |      | $\pi-\pi$        | 289.9 | 3.9  |
|               |      | Pyridinic-N      | 398.9 | 23.1 |
|               |      | Pyrrolic-N       | 399.9 | 35.5 |
| <b>GNRSP</b>  | N 1s | Graphitic-N      | 401.2 | 37.5 |
|               |      | Oxidized-N       | 403.1 | 3.9  |
|               |      | C=O              | 532.7 | 43.1 |
|               |      | C-O              | 534.5 | 49.3 |
|               | O 1s | H <sub>2</sub> O | 536.9 | 7.6  |
|               |      | C=C & C-C        | 285   | 48.8 |
|               |      | C-OH & C-O-C     | 286.2 | 18.1 |
|               |      | C-S              | 287.0 | 10.8 |
|               |      | C-P              | 287.8 | 8.6  |
|               |      | C=O & COOH       | 288.8 | 8.8  |
|               |      | $\pi-\pi$        | 290.5 | 4.9  |
|               |      | Pyridinic-N      | 400.3 | 17.2 |
| <b>GNRNSP</b> | N 1s | Pyrrolic-N       | 400.8 | 17.9 |
|               |      | Graphitic-N      | 401.5 | 50.2 |
|               |      | Oxidized-N       | 402.8 | 14.7 |
|               |      | C=O              | 531.8 | 51.9 |
|               | O 1s | C-O              | 533.8 | 43.4 |
|               |      | H <sub>2</sub> O | 536.1 | 4.7  |
|               |      | C=C & C-C        | 285   | 48.8 |
|               | C 1s | C-OH & C-O-C     | 286   | 18.1 |
|               |      | C-S              | 286.6 | 6.3  |
|               |      | C-P              | 287.3 | 7.3  |
|               |      | C-N              | 288.3 | 4.4  |
|               |      | C=O & COOH       | 289.4 | 2.2  |
|               |      | $\pi-\pi$        | 290.6 | 2.4  |
|               |      | Pyridinic-N      | 398.7 | 24.2 |
|               |      | Pyrrolic-N       | 399.6 | 33   |
|               | N 1s | Graphitic-N      | 400.8 | 37.3 |
|               |      | Oxidized-N       | 402.5 | 5.5  |

---

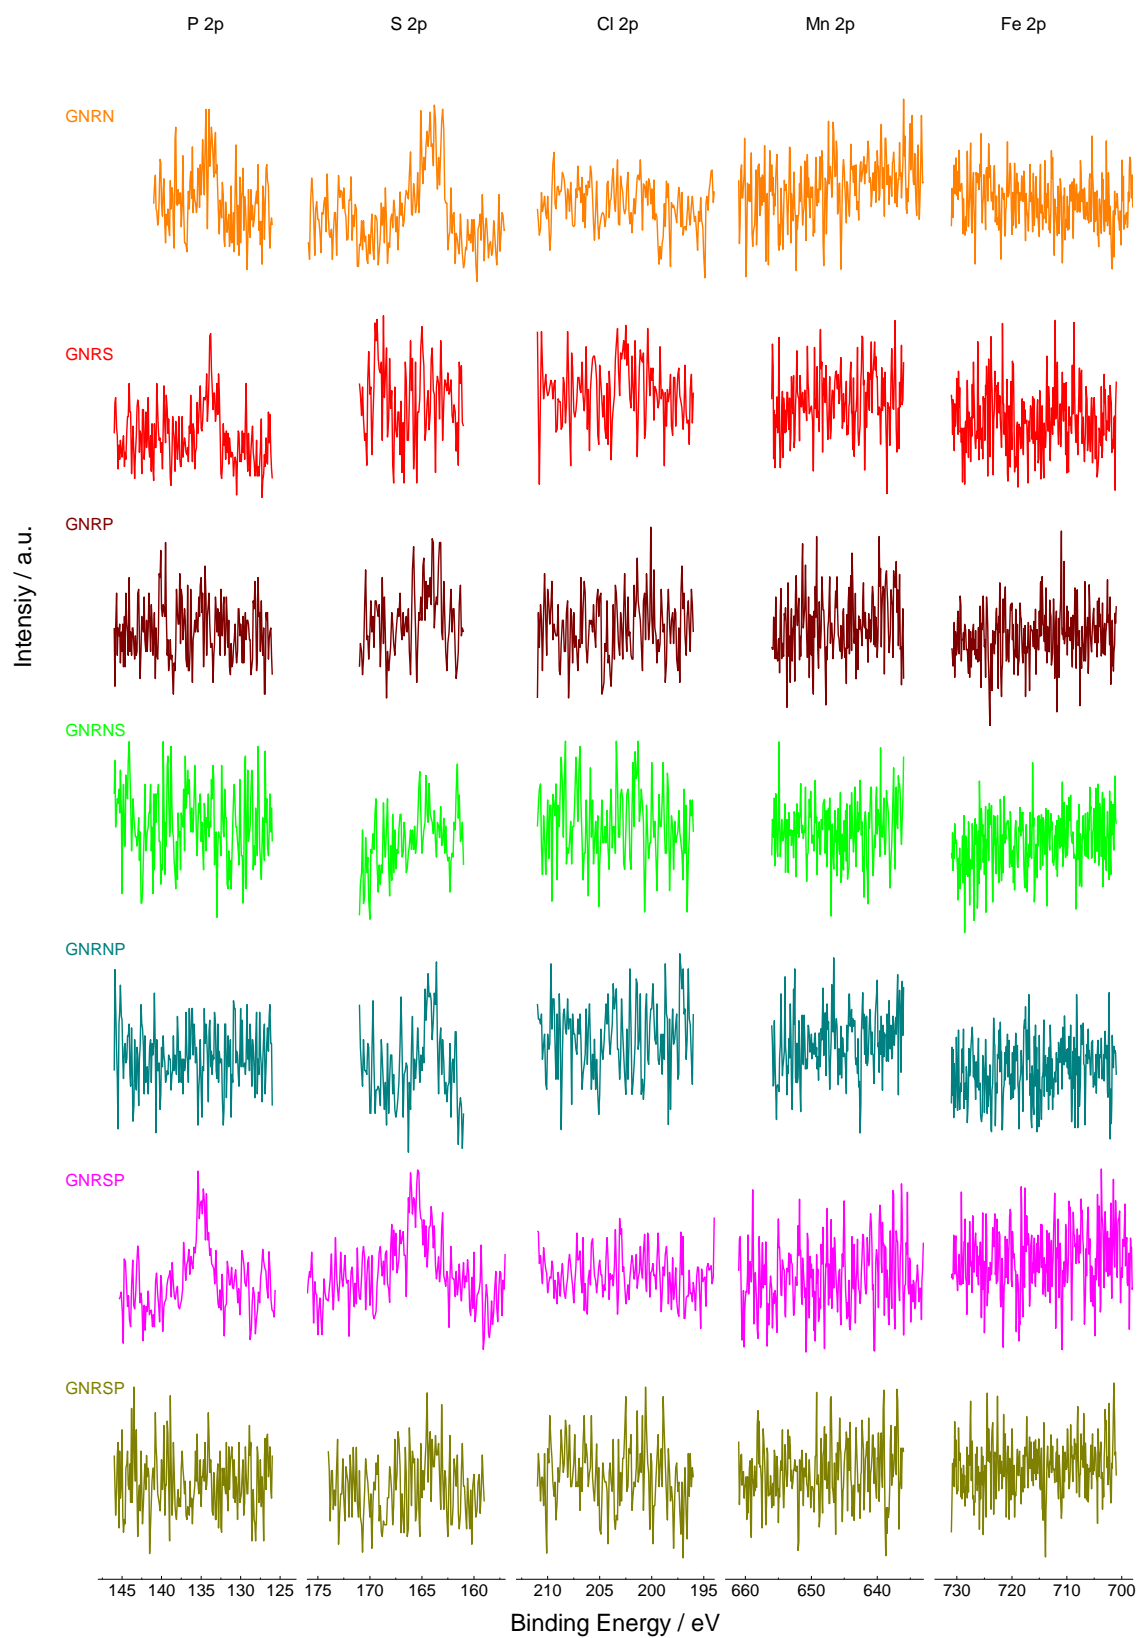

**Figure S5.** HR-XPS curves for the undoped and doped GNR samples.

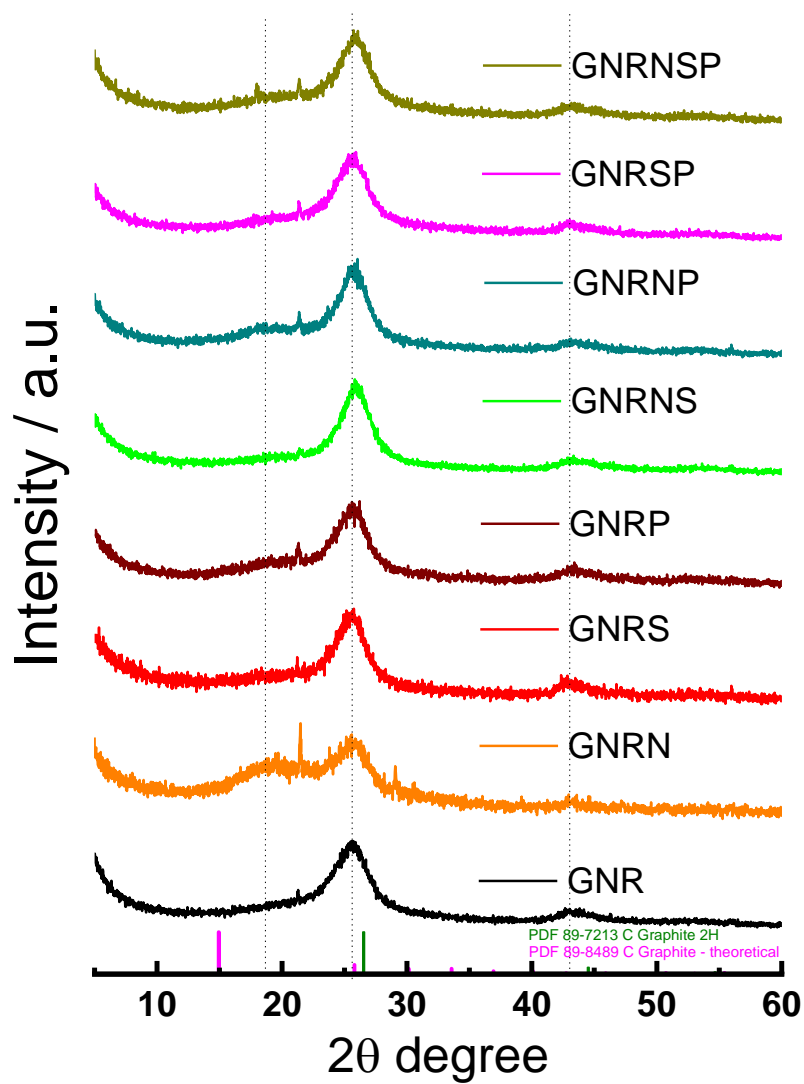

**Figure S6.** XRD spectra for the undoped and doped GNR samples.

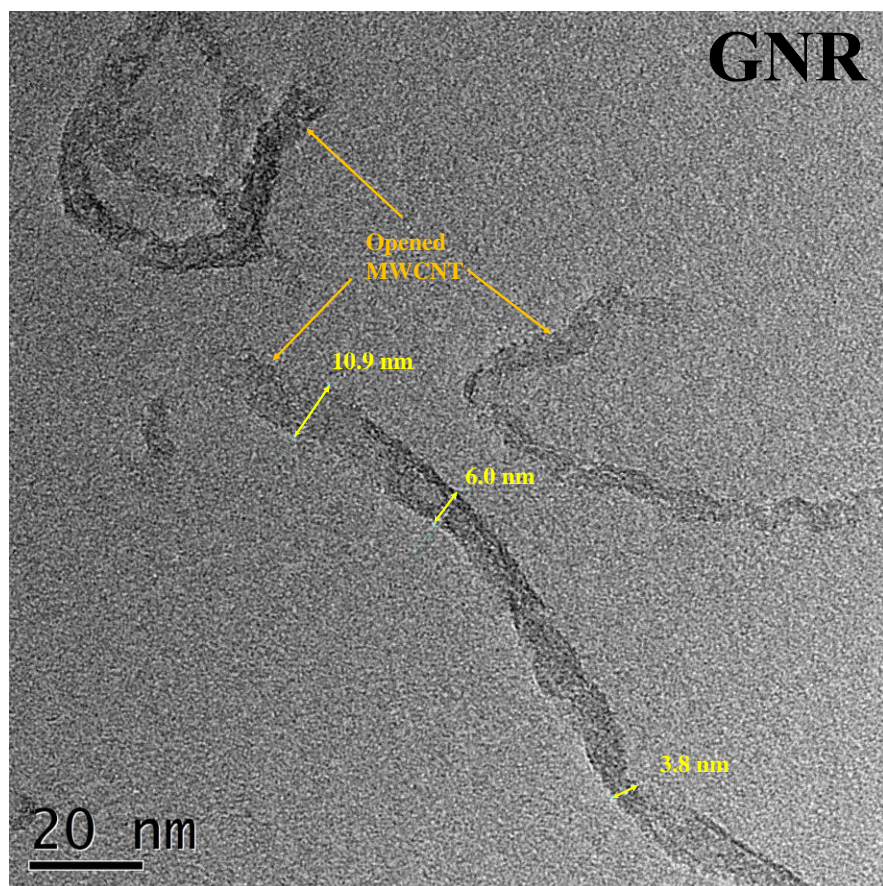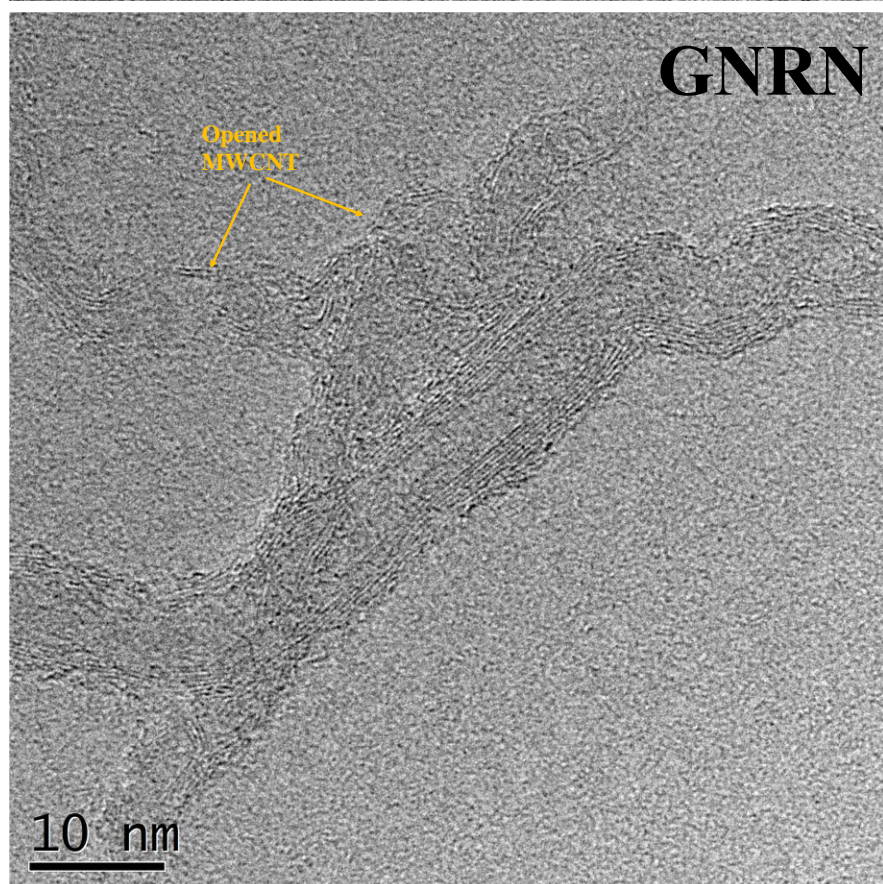



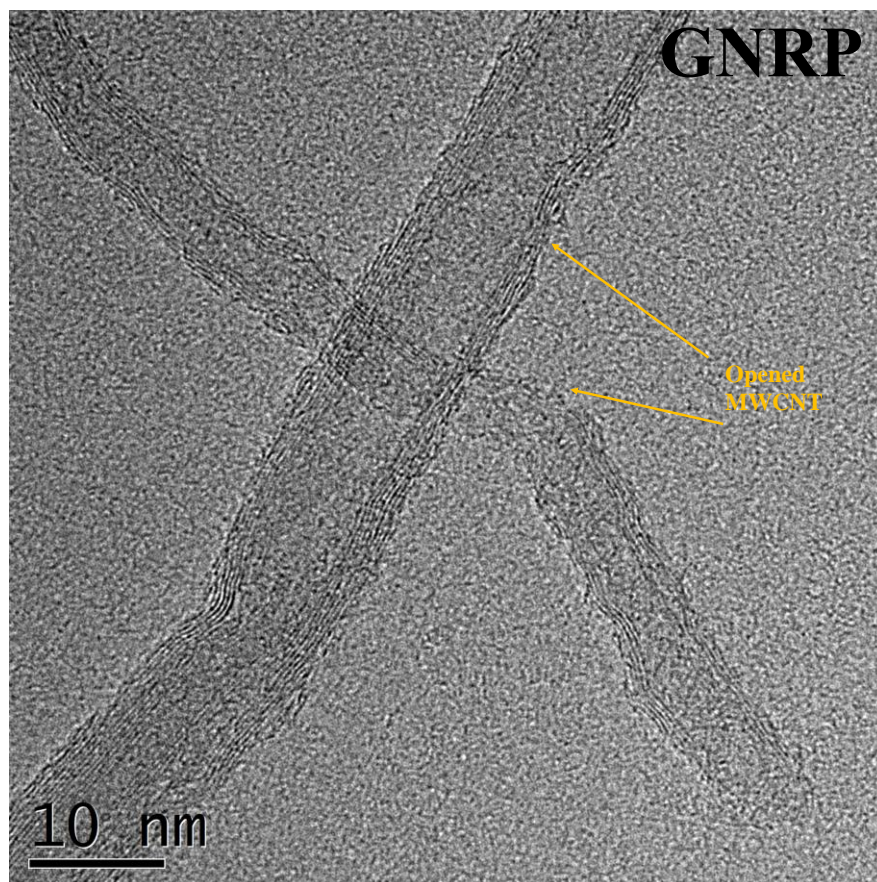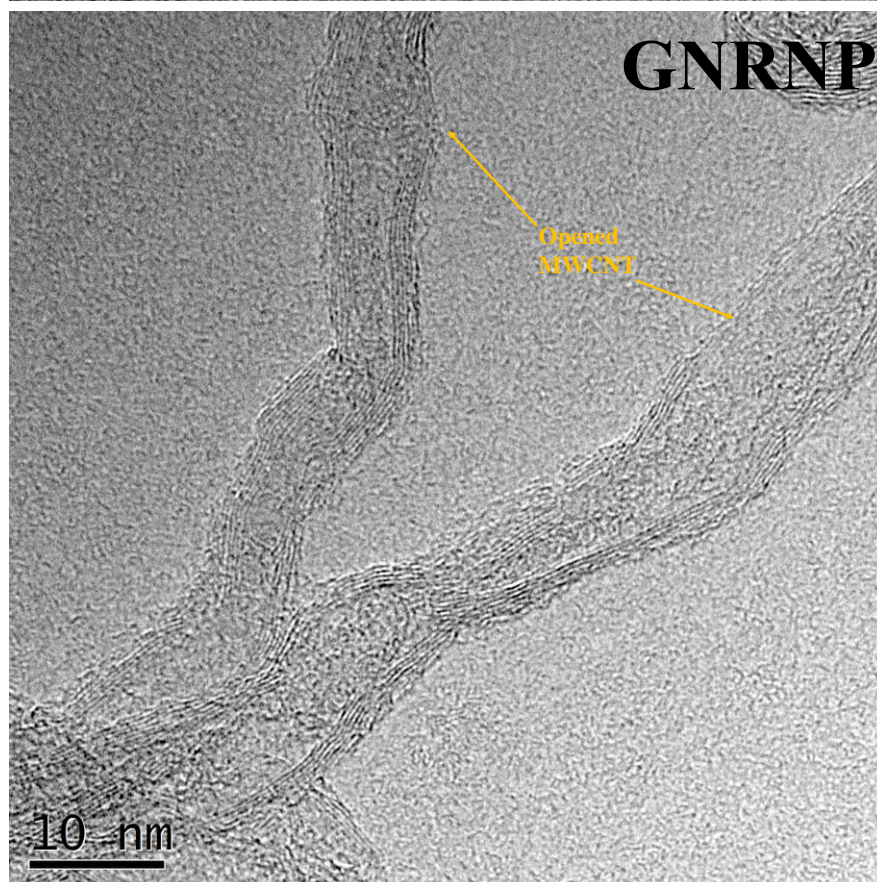



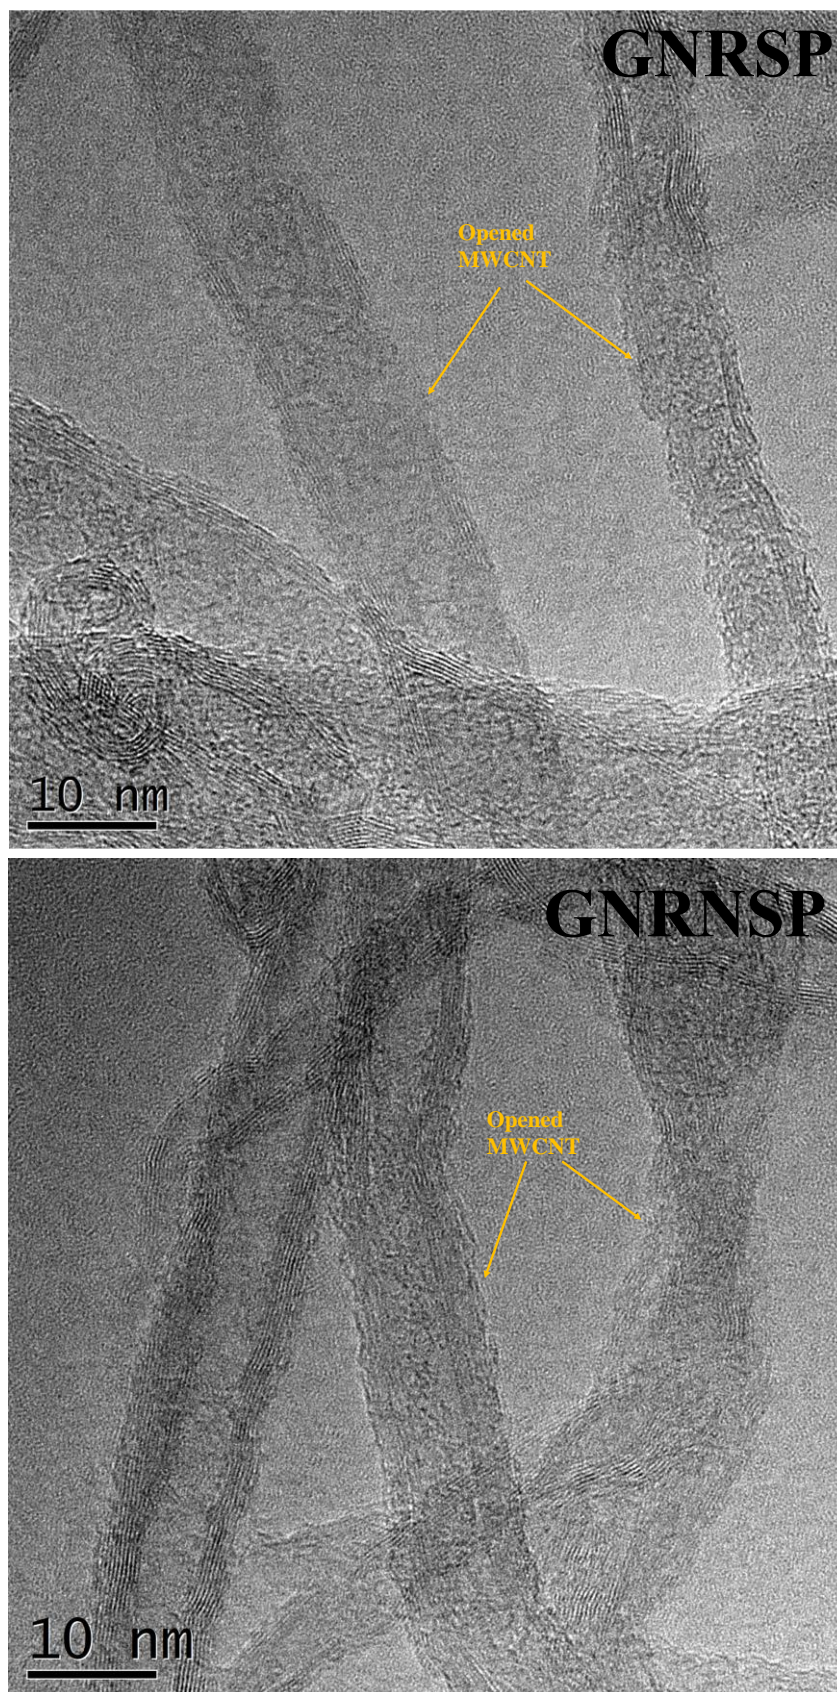

**Figure S7.** Representative TEM images for the undoped and doped GNR samples.

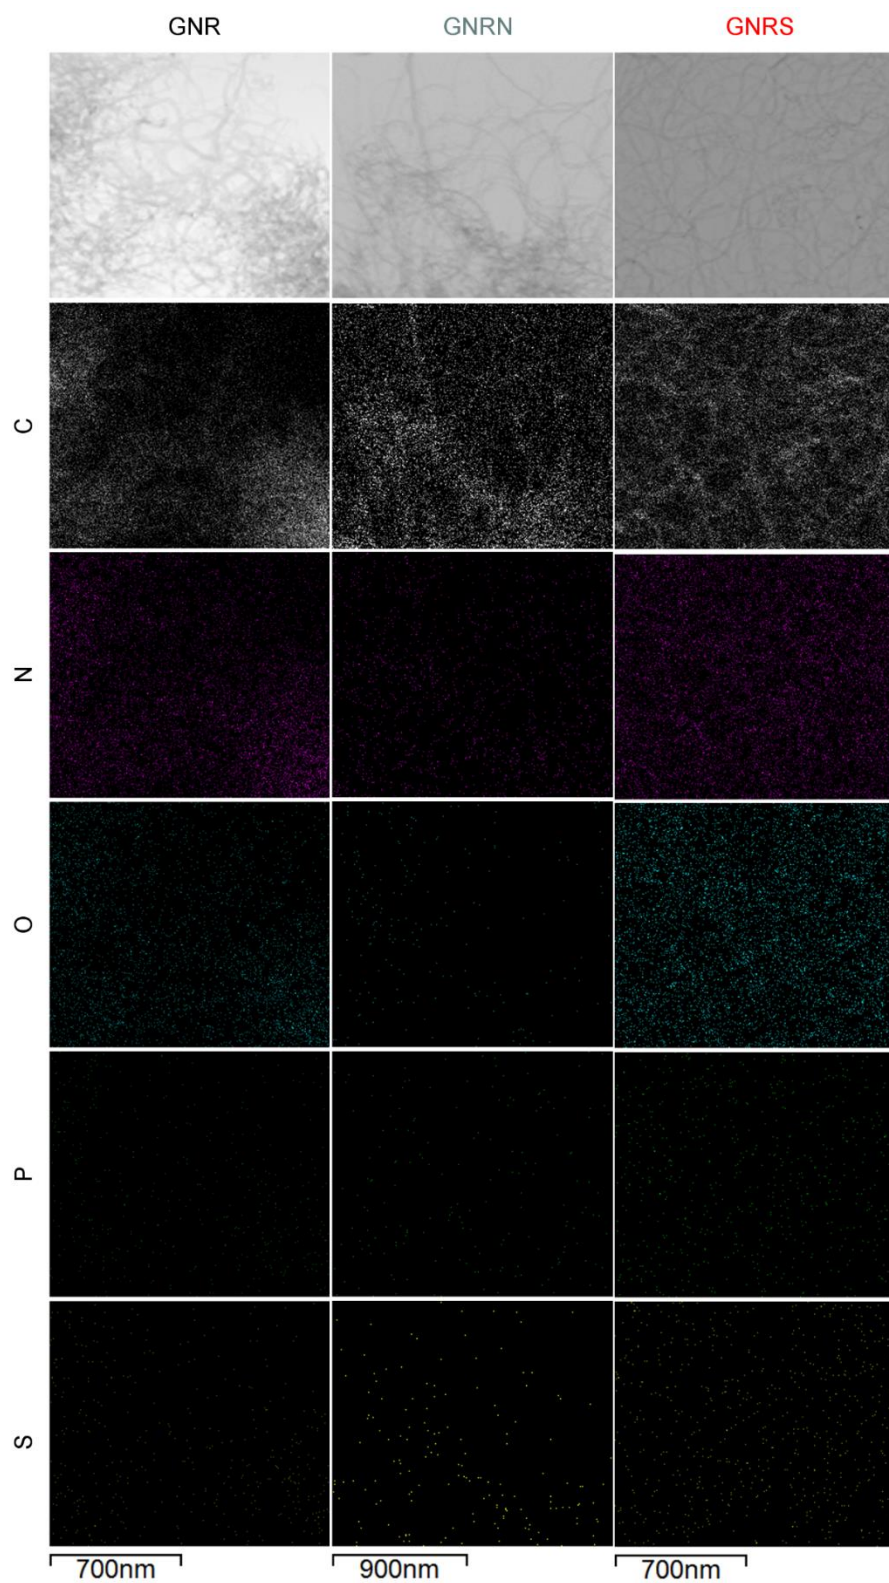

**Figure S8.** Scanning TEM and EDX mapping images obtained for the GNR, GNRN, and GNRS samples.



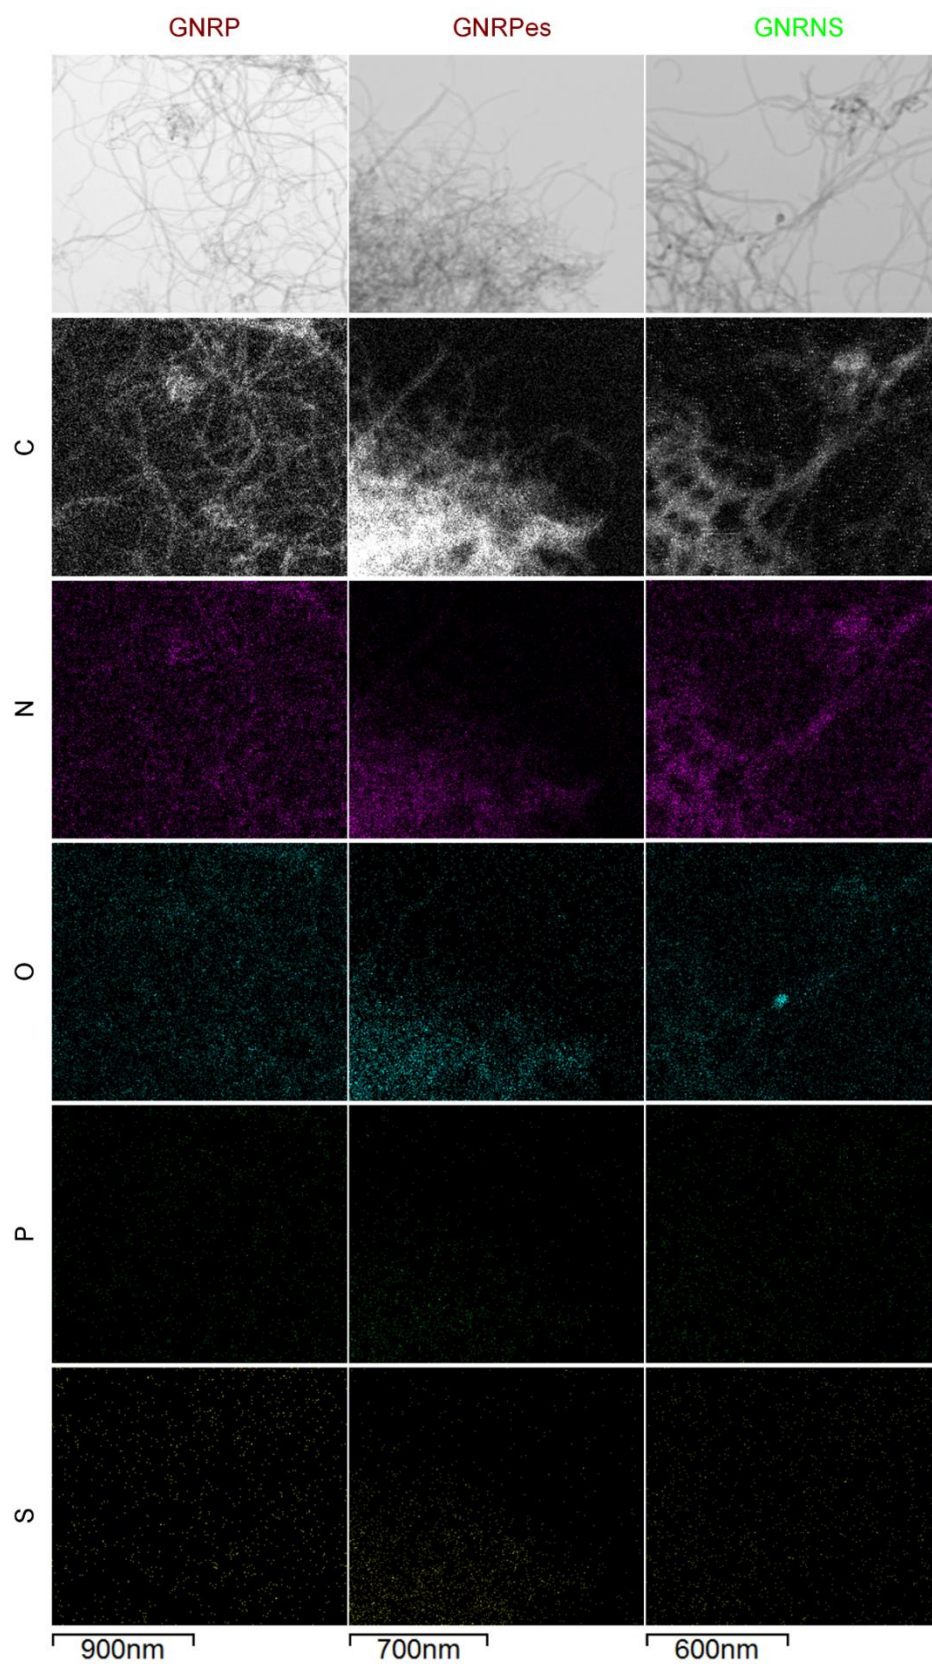

**Figure S9.** Scanning TEM and EDX mapping images obtained for the GNRP, GNRPes, and GNRNS samples.

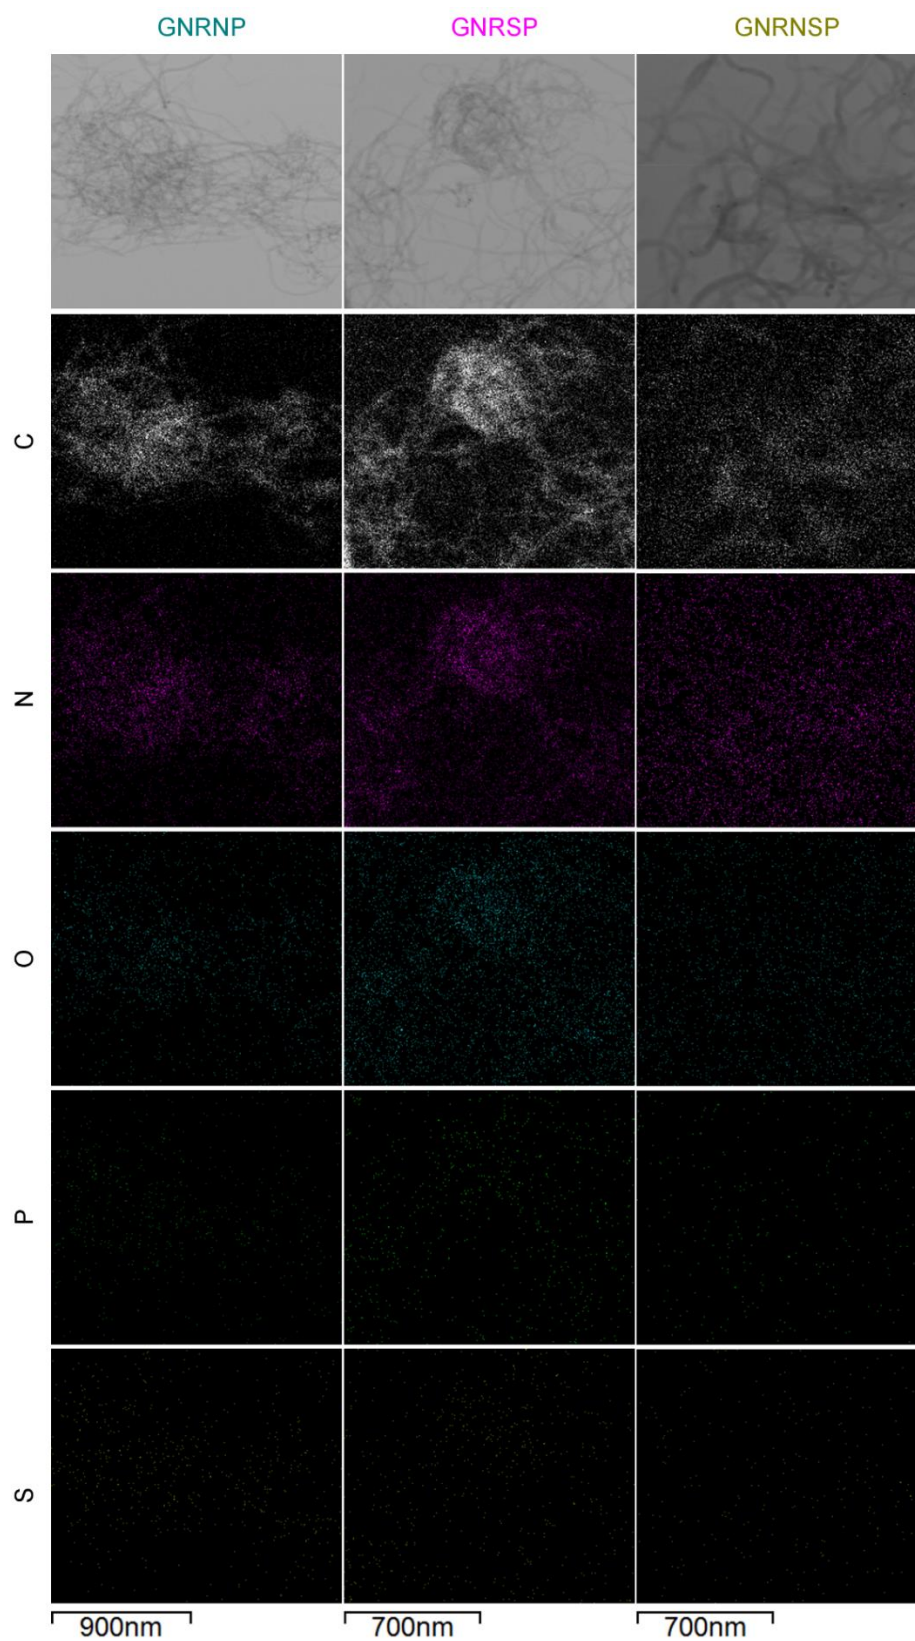

**Figure 10.** Scanning TEM and EDX mapping images obtained for GNRNP, GNRSP, and GNRNSP samples.

**Table S6.** Resistance of electrolytic solution ( $R_s$ ) values obtained for the glassy carbon (GC) electrode modified with thin-film of undoped or doped GNR samples. The  $R_s$  values were obtained from the application of different  $N_2$ -saturated electrolyte solutions without electrode rotation using electrochemical impedance (data shown in Figure S5).

| Catalyst film | $R_s$ ( $\Omega$ )                   |                                      |                                  |
|---------------|--------------------------------------|--------------------------------------|----------------------------------|
|               | <i>in 0.5 M <math>H_2SO_4</math></i> | <i>in 0.1 M <math>K_2SO_4</math></i> | <i>in 0.1 M <math>KOH</math></i> |
| <b>GNR</b>    | 4.68                                 | 71.92                                | 36.55                            |
| <b>GNRN</b>   | 4.54                                 | 29.71                                | 35.04                            |
| <b>GNRS</b>   | 4.44                                 | 30.58                                | 38.82                            |
| <b>GNRP</b>   | 5.91                                 | 26.64                                | 38.04                            |
| <b>GNRNS</b>  | 5.24                                 | 27.24                                | 35.60                            |
| <b>GNRNP</b>  | 7.76                                 | 25.74                                | 46.37                            |
| <b>GNRSP</b>  | 4.89                                 | 48.50                                | 36.59                            |
| <b>GNRNSP</b> | 4.46                                 | 33.69                                | 41.00                            |

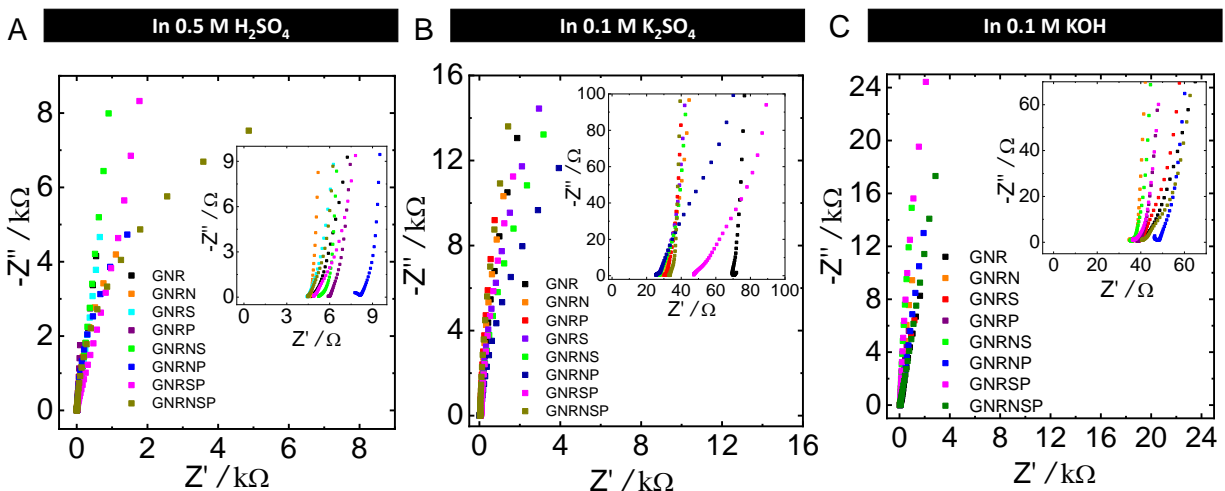

**Figure S11.** EIS results for the GC electrode modified with 150  $\mu\text{g cm}^{-2}$  of undoped or doped GNR catalyst. The plane impedance plot was obtained in  $\text{N}_2$ -saturated (A) 0.5 M  $\text{H}_2\text{SO}_4$ , (B) 0.1 M  $\text{K}_2\text{SO}_4$ , and (C) 0.1 M KOH using the OCP value as a constant potential for the EIS measurement.



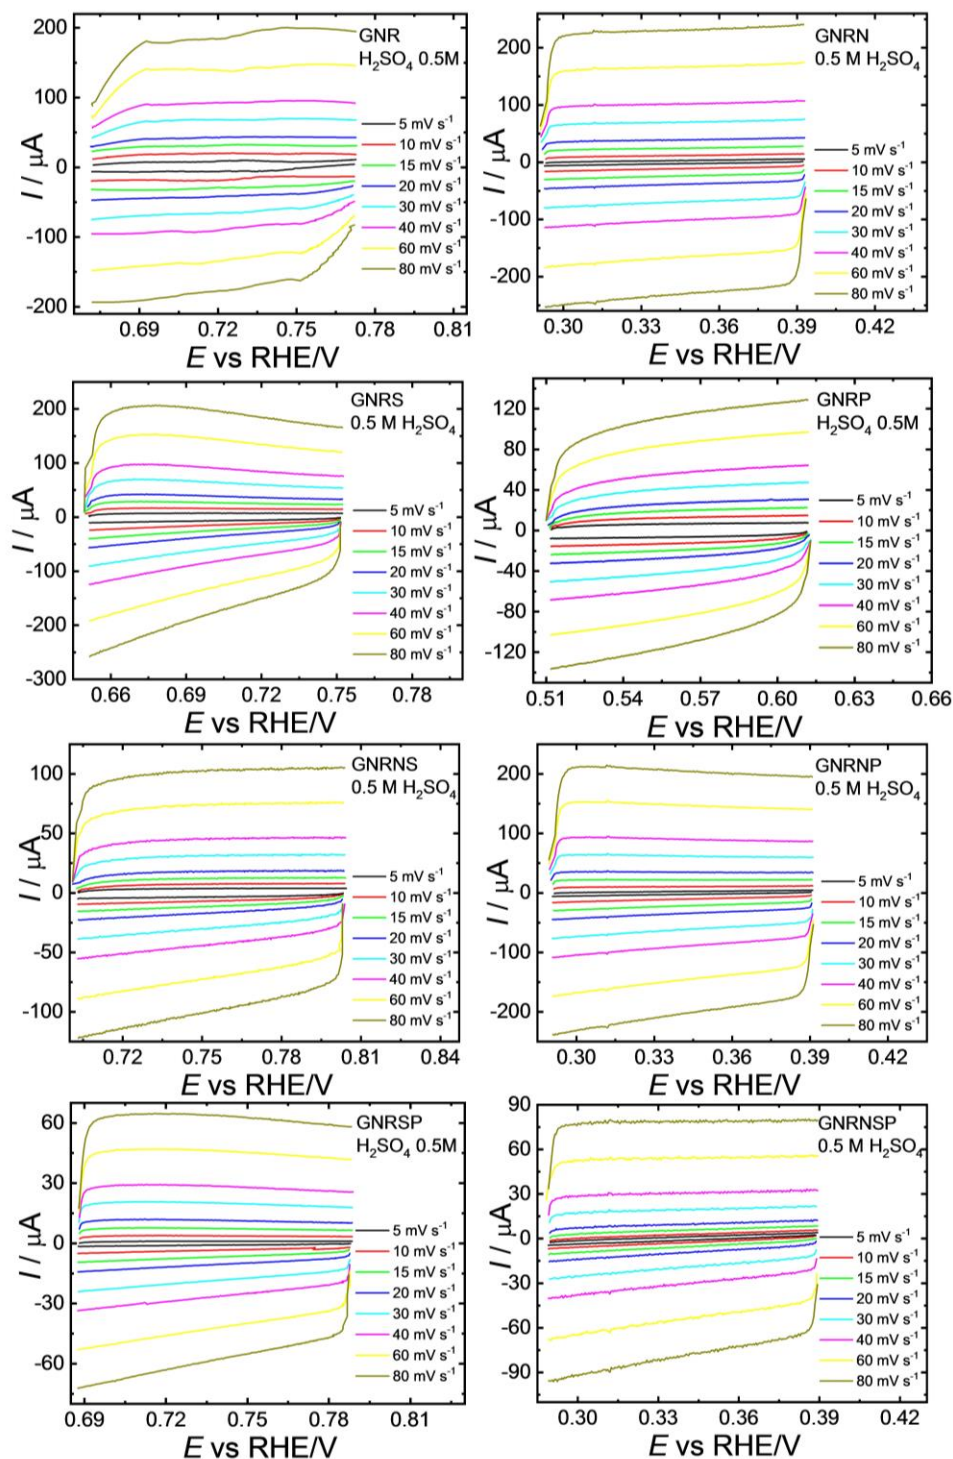

**Figure S12.** Cyclic voltammograms obtained in a non-Faradaic potential range for the GC electrode modified with  $150 \mu\text{g cm}^{-2}$  of undoped or doped GNR catalyst in  $\text{N}_2$ -saturated  $0.5 \text{ M H}_2\text{SO}_4$ . Prior to the beginning of the subsequent potential sweep, the modified electrode was kept at each vertex potential for 10 seconds. Scanning was initiated at higher potentials.

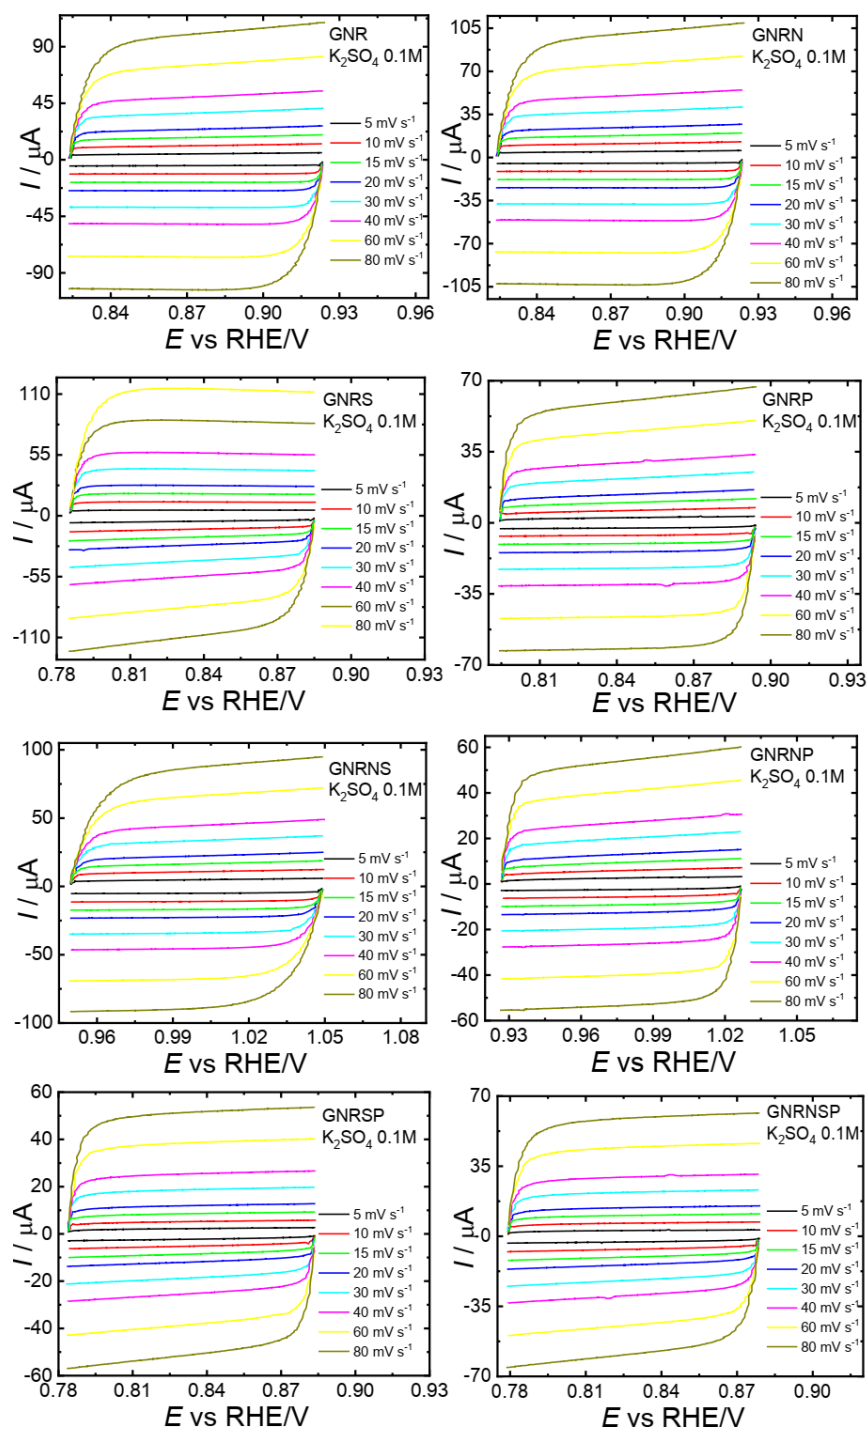

**Figure S13.** Cyclic voltammograms obtained in a non-Faradaic potential range for the GC electrode modified with  $150 \mu\text{g cm}^{-2}$  of undoped or doped GNR catalyst in  $\text{N}_2$ -saturated  $0.1 \text{ M K}_2\text{SO}_4$ . Prior to the beginning of the subsequent potential sweep, the modified electrode was kept at each vertex potential for 10 seconds. Scanning was initiated at higher potentials.

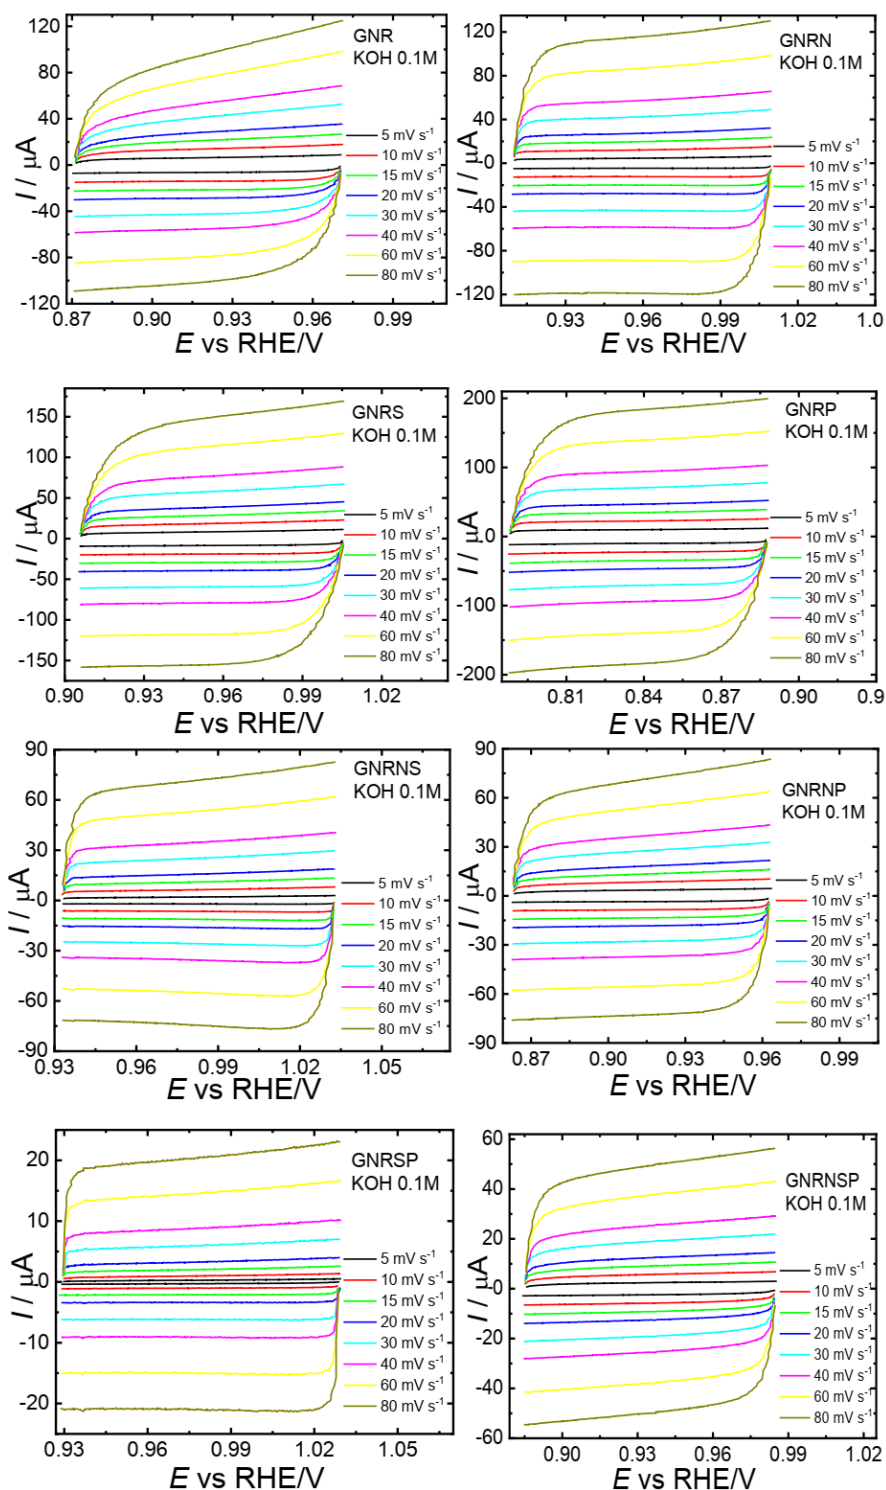

**Figure S14.** Cyclic voltammograms obtained in a non-Faradaic potential range for the GC electrode modified with  $150 \mu\text{g cm}^{-2}$  of undoped or doped GNR catalyst in  $\text{N}_2$ -saturated 0.1 M KOH. Prior to the beginning of the subsequent potential sweep, the modified electrode was kept at each vertex potential for 10 seconds. Scanning was initiated at higher potentials.

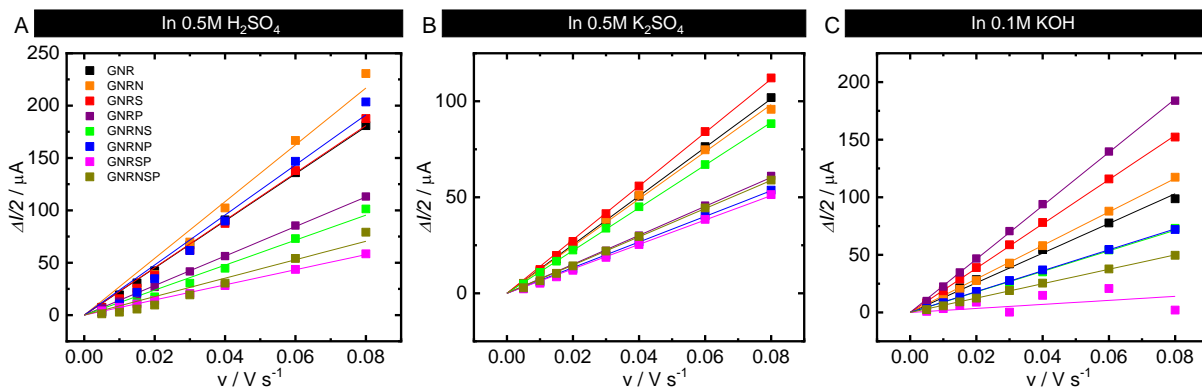

**Figure S15.**  $\Delta I/2$  vs. potential scan rates ( $v$ ) plots. The plots were constructed based on the differences between anodic ( $I_a$ ) and cathodic ( $I_c$ ) double layer charging currents ( $\Delta I$ ) from (A) Figure S7 (obtained in  $N_2$ -saturated 0.5 M  $H_2SO_4$ ), (B) Figure S8 (obtained in  $N_2$ -saturated 0.1 M  $K_2SO_4$ ), and (C) Figure S9 (obtained in  $N_2$ -saturated 0.1 M  $KOH$ ).

The selectivity toward  $HO_2^-$  production ( $X_{HO_2^-}(\%)$ ) and the average number of electrons transferred per  $O_2$  molecule ( $n_{av}$ ) were calculated using the data obtained from the RRDE-based analysis (Figure 7) according with the Equations (S1) and (S2) [3]:

$$S_{HO_2^-} = \frac{2I_r/N}{I_d + \frac{I_r}{N}} \times 100\% \quad (S1)$$

where  $I_d$  is the measured disk current,  $I_r$  is the ring current, which is given by the  $HO_2^-$  oxidation, and  $N$  is the efficiency of collection for the ring electrode ( $N = 0.26$ ).

$$n_{av} = \frac{4I_d}{I_d + \frac{I_r}{N}} \quad (S2)$$



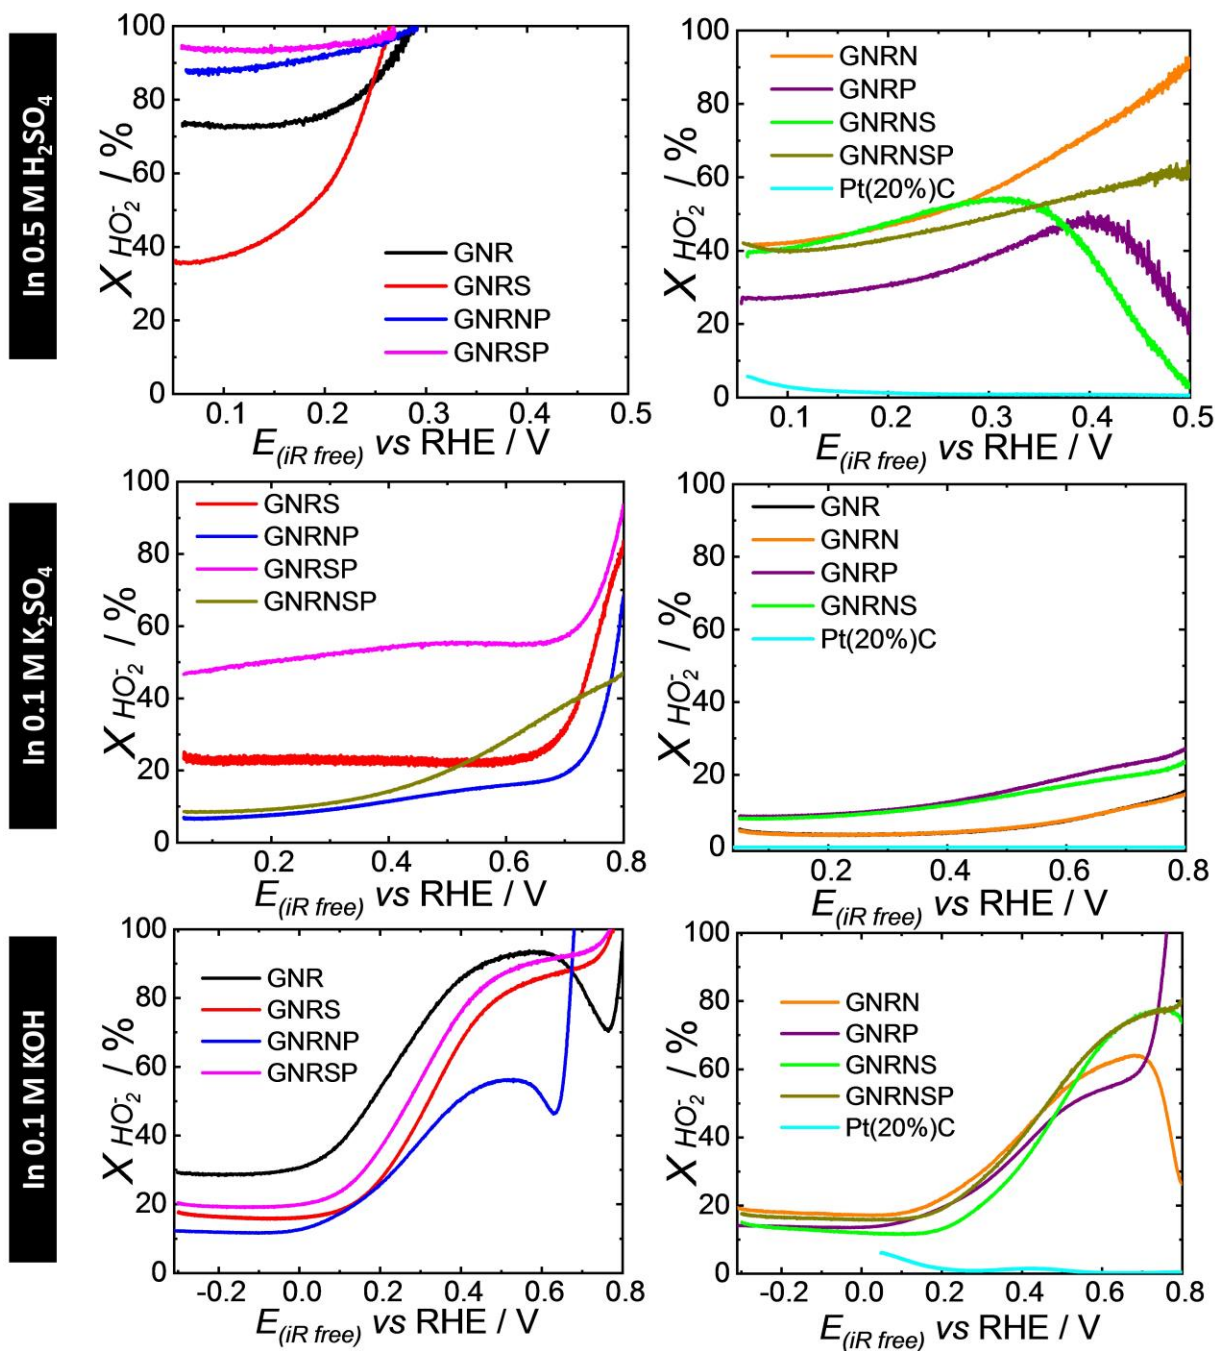

**Figure S16.** Selectivity for hydrogen peroxide production ( $X_{H_2O_2}$ ) based on the electrochemical results obtained from LSV analyses conducted in a RRDE system for GC modified with  $150 \mu g \text{ cm}^{-2}$  of undoped or doped GNR catalyst (Figure 7) in  $O_2$ -saturated 0.5 M  $H_2SO_4$ , 0.1 M  $K_2SO_4$ , and 0.1 M KOH (1600 rpm).

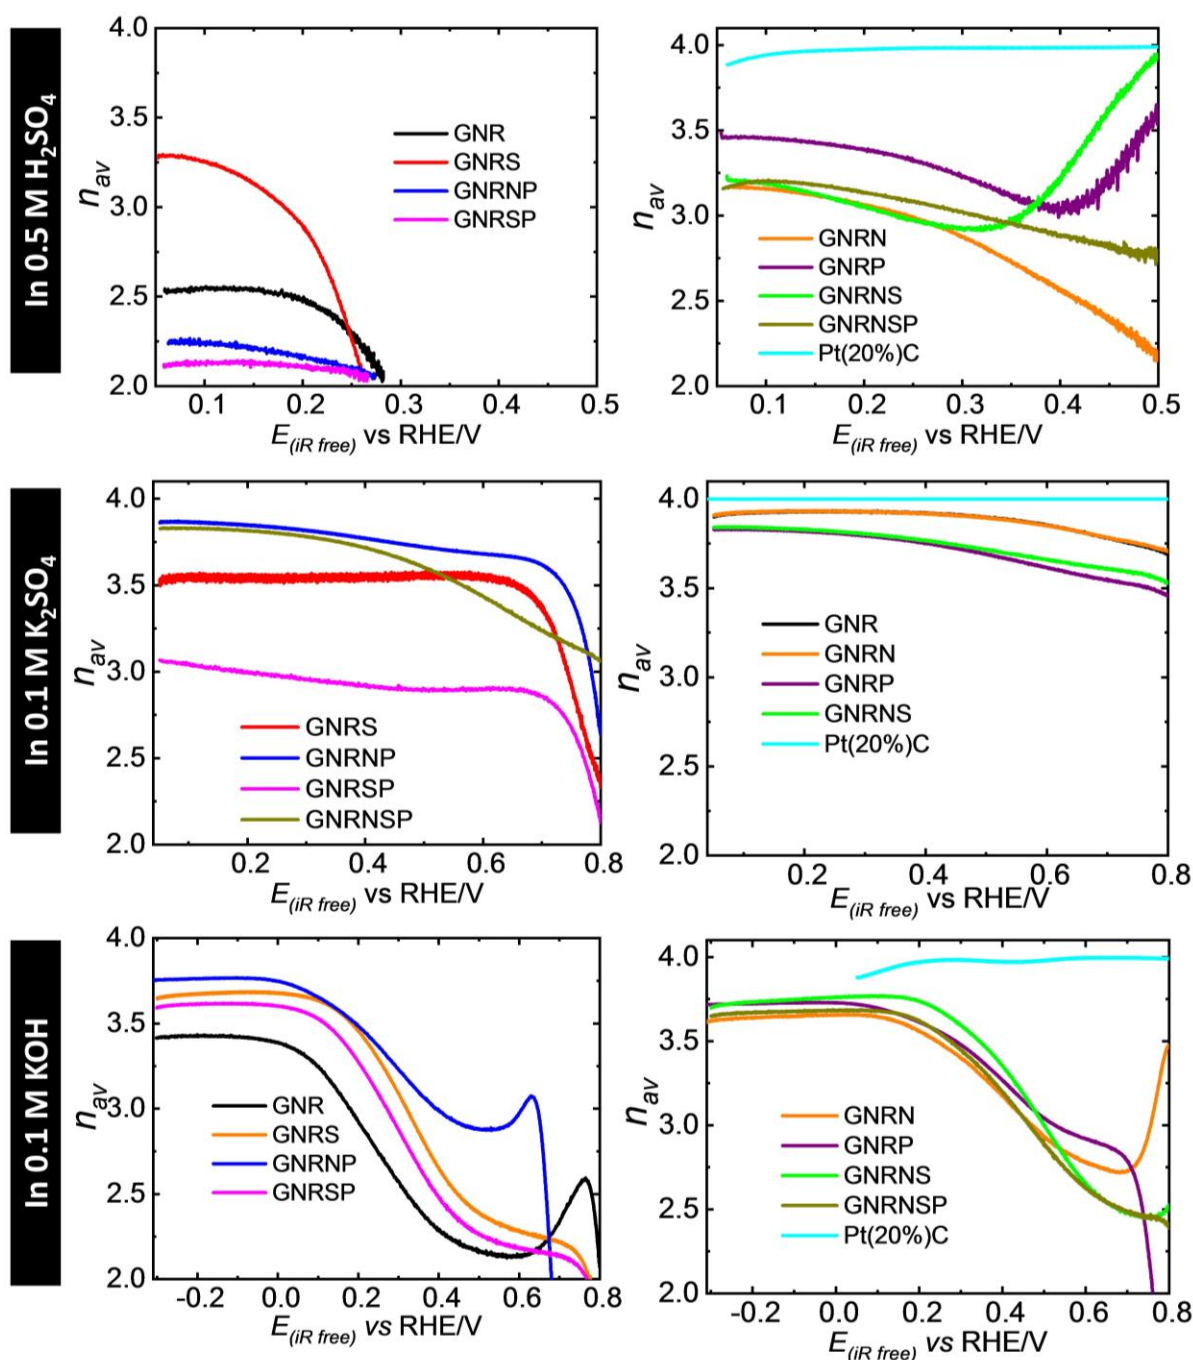

**Figure S17.** Average number of electrons transferred ( $n_{av}$ ) during the ORR on the disk electrode at varying potentials based on the electrochemical results obtained from the LSV analyses conducted in a RRDE system for GC modified with 150  $\mu\text{g cm}^{-2}$  of undoped or doped GNR catalyst (Figure 7) in  $\text{O}_2$ -saturated 0.5 M  $\text{H}_2\text{SO}_4$ , 0.1 M  $\text{K}_2\text{SO}_4$ , and 0.1 M KOH (1600 rpm).

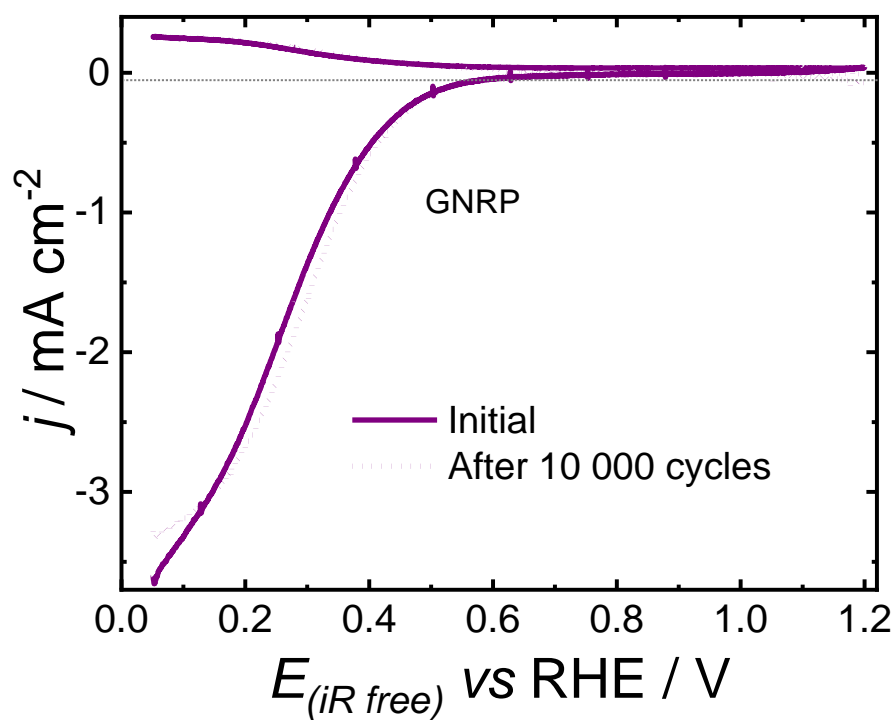

**Figure S18.** LSV-RRDE curves obtained in  $\text{O}_2$ -saturated 0.5 M  $\text{H}_2\text{SO}_4$  ( $\omega = 1600$  rpm,  $v = 10$   $\text{mV s}^{-1}$ , scans were initiated at 0.05 V) for GC electrode modified with  $150 \mu\text{g cm}^{-2}$  of GNRP before and after the application of 10 000 potential cycles.

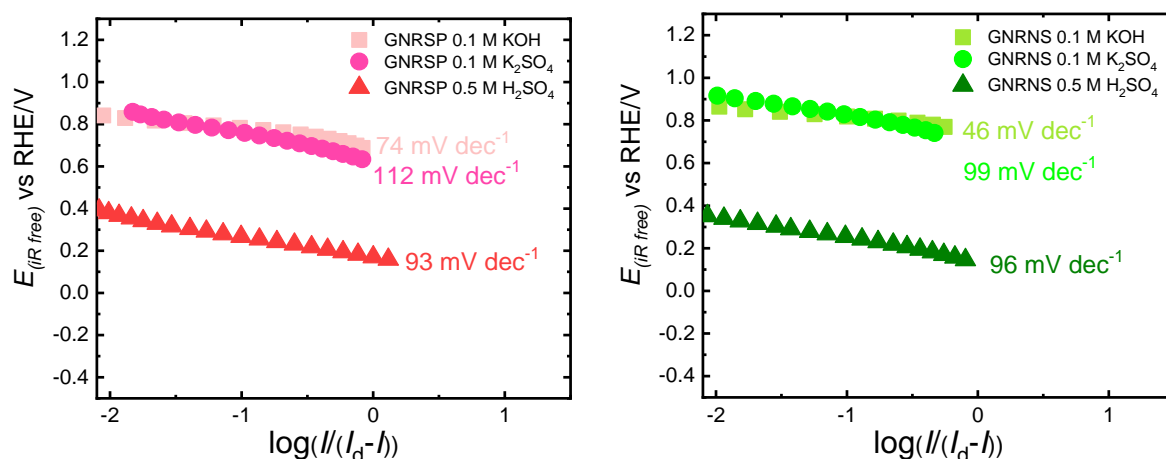

**Figure S19.** Tafel plots for ORR on (a) GNRSP and (b) GNRNS catalysts obtained in  $\text{O}_2^-$  saturated 0.5 M  $\text{H}_2\text{SO}_4$ , 0.1 M  $\text{K}_2\text{SO}_4$ , and 0.1 M KOH electrolytes (data extracted from Figure 7).

## References

- [1] S.E. Colthup, N. B.; Daly, L. H.; Wiberley, Introduction to infrared and Raman spectroscopy, 3rd edn, Academic Press, Inc., 1990.
- [2] R.M. SILVERSTEIN, F.X. WEBSTER, D.J. KIEMLE, Spectrometric Identification of Organic Compounds, 7th edn, John Wiley & Sons. Inc., 2005.
- [3] G. V. Fortunato, L.S. Bezerra, E.S.F. Cardoso, M.S. Kronka, A.J. Santos, A.S. Greco, J.L.R. Júnior, M.R. V. Lanza, G. Maia, Using Palladium and Gold Palladium Nanoparticles Decorated with Molybdenum Oxide for Versatile Hydrogen Peroxide Electroproduction on Graphene Nanoribbons, ACS Appl. Mater. Interfaces. 14 (2022) 6777–6793. <https://doi.org/10.1021/acsami.1c22362>.
